# Supplementary material for: Microbiome Data Distinguish Patients with Clostridium difficile Infection and Non-C. difficile-Associated Diarrhea from Healthy Controls
Source: PubMed Central journal article supplement — mBio. 2014 May 6;5(3):e01021-14. doi: 10.1128/mBio.01021-14 (PMC4010826; doi:10.1128/mbio.01021-14), 2014-05-06
Supplement: mbo002141820st2.pdf [file mbo002141820st2.pdf]

**Table S2. Breakdown of the individuals in each community type.**

| <b>Community Type</b> | <b>#Diarrheal Controls</b> | <b>#Non-Diarrheal Controls</b> | <b>#Cases</b> | <b>Total n</b> | <b>%Diarrheal Control</b> | <b>%Non-Diarrheal Control</b> | <b>%Case</b> |
|-----------------------|----------------------------|--------------------------------|---------------|----------------|---------------------------|-------------------------------|--------------|
| <b>1</b>              | 6                          | 0                              | 14            | 20             | 30.0                      | 0.0                           | 70.0         |
| <b>8</b>              | 4                          | 0                              | 5             | 9              | 44.4                      | 0.0                           | 55.6         |
| <b>10</b>             | 5                          | 1                              | 7             | 13             | 38.5                      | 7.7                           | 53.8         |
| <b>4</b>              | 11                         | 6                              | 18            | 35             | 31.4                      | 17.1                          | 51.4         |
| <b>6</b>              | 11                         | 0                              | 9             | 20             | 55.0                      | 0.0                           | 45.0         |
| <b>5</b>              | 9                          | 3                              | 9             | 21             | 42.9                      | 14.3                          | 42.9         |
| <b>2</b>              | 19                         | 0                              | 7             | 26             | 73.1                      | 0.0                           | 26.9         |
| <b>12</b>             | 5                          | 19                             | 7             | 31             | 16.1                      | 61.3                          | 22.6         |
| <b>3</b>              | 2                          | 34                             | 10            | 46             | 4.3                       | 73.9                          | 21.7         |
| <b>9</b>              | 5                          | 29                             | 4             | 38             | 13.2                      | 76.3                          | 10.5         |
| <b>7</b>              | 6                          | 16                             | 2             | 24             | 25.0                      | 66.7                          | 8.3          |
| <b>13</b>             | 0                          | 13                             | 1             | 14             | 0.0                       | 92.9                          | 7.1          |
| <b>11</b>             | 6                          | 34                             | 1             | 41             | 14.6                      | 82.9                          | 2.4          |
