# Supplementary figures and images for: Microbiome Data Distinguish Patients with Clostridium difficile Infection and Non-C. difficile-Associated Diarrhea from Healthy Controls
Source: PubMed Central journal article supplement — mBio. 2014 May 6;5(3):e01021-14. doi: 10.1128/mBio.01021-14 (PMC4010826; doi:10.1128/mbio.01021-14), 2014-05-06

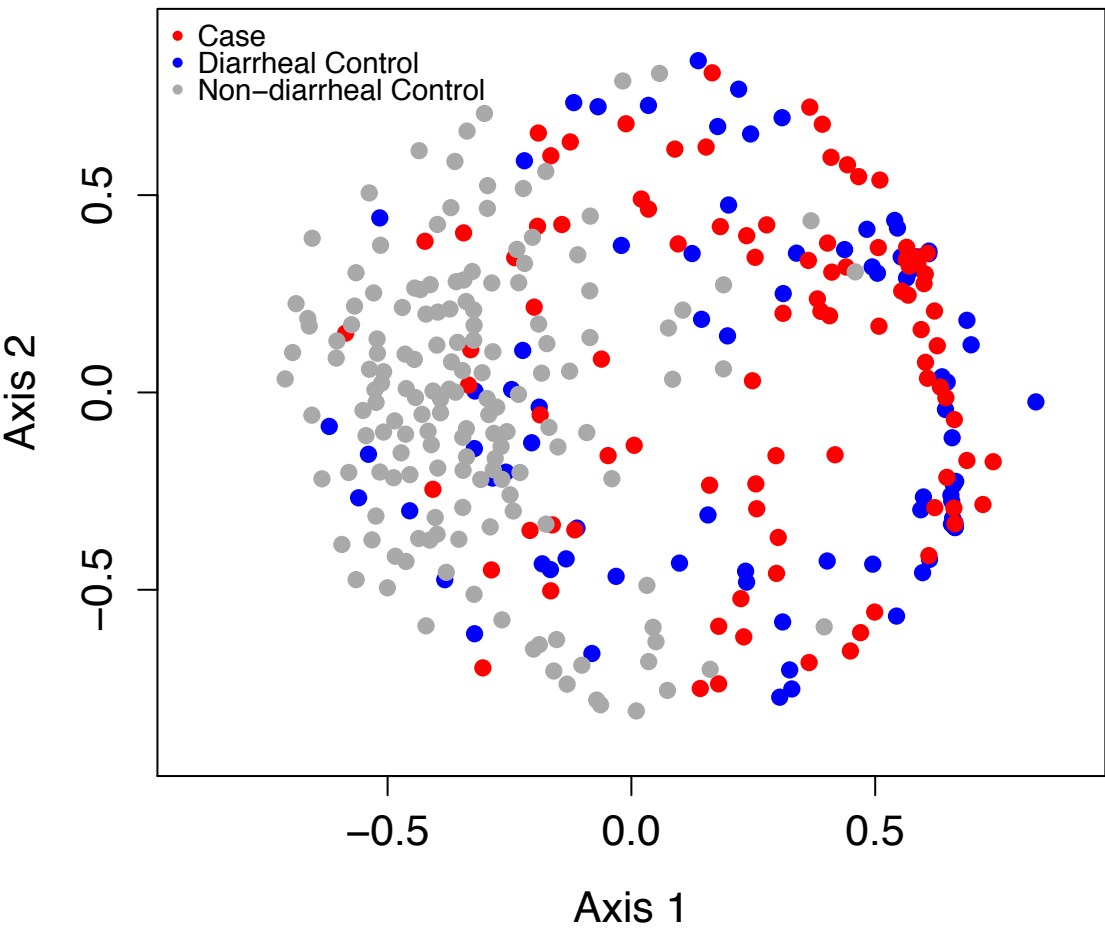

Supplement: mbo002141820sf01.pdf [file mbo002141820sf01.pdf]
